# Supplementary material
Source: Springer Nature journal article supplement (https://www.springermedizin.de/resource/supplementary/12990_2010_273_MOESM4_ESM.pdf/9612924)

# A CFA, WDR neurons

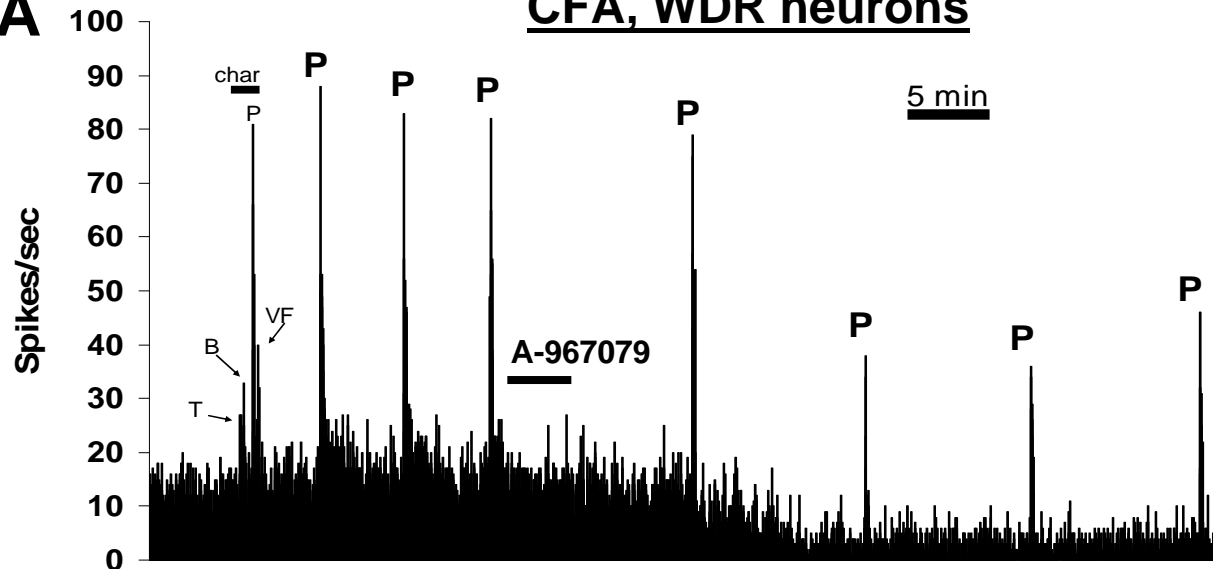

# B

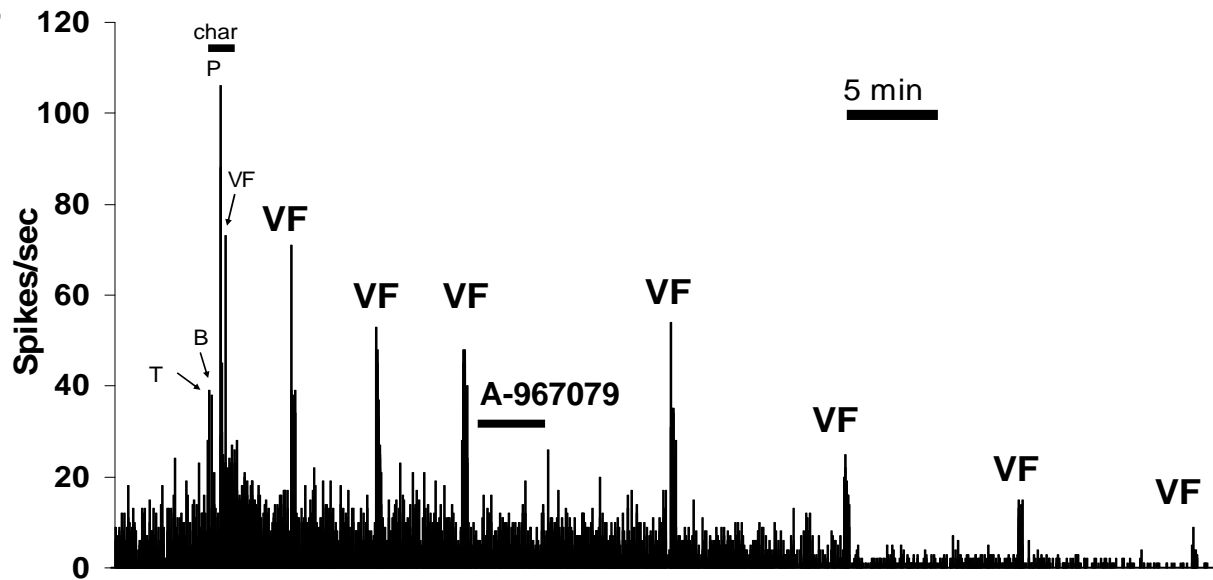

Supplement: MOESM4 [file 9612924]
